# Supplementary material for: Synthesis of a phosphine imide bearing a hydrosilane moiety, and its water-driven reduction to a phosphine
Source: Royal Society of Chemistry journal article supplement (doi:10.1039/c3cc43955k), 2013-01-01
Supplement: c3cc43955k.pdf [file c3cc43955k.pdf]

## Supporting Information

### Synthesis of a Phosphine Imide Bearing a Triarylhydrosilane Moiety, and Its Water-Driven Reduction to a Phosphine

Naokazu Kano,\* Kazuhide Yanaizumi, Xiangtai Meng, Nizam  
Havare and Takayuki Kawashima\*

Department of Chemistry, Graduate School of Science, The University of  
Tokyo, 7-3-1 Hongo, Bunkyo-ku, Tokyo 113-0033, Japan

## Experimental details

All the experiments were carried out under nitrogen or argon atmosphere. All the solvents and reagents were purified and dried prior to use.

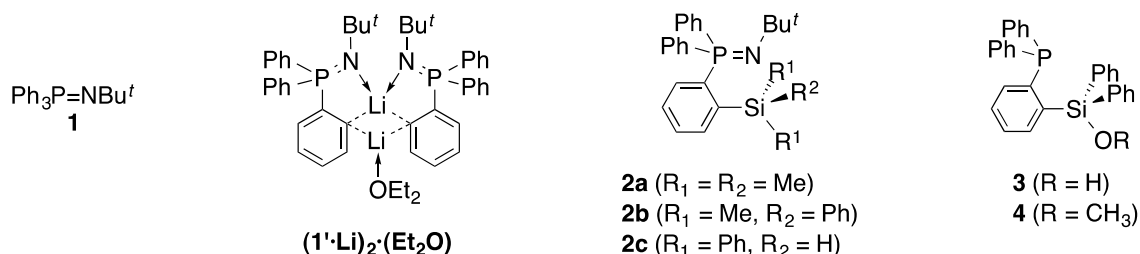

### Lithiation of triphenylphosphine *N-tert*-butylimide (**1**).

An Et<sub>2</sub>O solution of methyllithium (1.09 M, 20 mL) was added to iminophosphorane **1** (3.87 g, 11.6 mmol) at room temperature and stirred for 2 hours. After evaporation of the solvent in vacuo, the resulting yellow solid was washed with dry hexane in a glovebox and dried in vacuo to give the almost pure lithiated iminophosphorane [2-C<sub>6</sub>H<sub>4</sub>(PPh<sub>2</sub>N(*tert*-butyl))Li]<sub>2</sub>·Et<sub>2</sub>O ((**1'**·Li)<sub>2</sub>·(Et<sub>2</sub>O)) (3.51 g, 93%). It was used for the synthesis of **2a-c** without further purification.

**(1'·Li)<sub>2</sub>·(Et<sub>2</sub>O)**: pale yellow powder, <sup>1</sup>H NMR (400 MHz, C<sub>6</sub>D<sub>6</sub>) δ 1.08 (t, *J* = 6.8 Hz, 6H), 1.14 (s, 18H), 3.24 (q, *J* = 6.8 Hz, 4H), 7.07-7.14 (m, 16H), 7.24-7.31 (m, 4H), 7.87-7.99 (m, 8H). <sup>31</sup>P NMR (162 MHz, C<sub>6</sub>D<sub>6</sub>) δ 14.4.

### Synthesis of diphenyl(2-trimethylsilylphenyl)phosphine *N-tert*-butylimide (**2a**)

Chlorotrimethylsilane (0.250 μL, 1.05 mmol) was added to an Et<sub>2</sub>O solution (10 mL) of lithiated iminophosphorane (**1'**·Li)<sub>2</sub>·(Et<sub>2</sub>O) (390 mg, 0.520 mmol) at −78 °C, and then warmed gradually up to room temperature for overnight. After evaporation of the solvent, water was added to the white solid, and it was extracted with CH<sub>2</sub>Cl<sub>2</sub> and dried with MgSO<sub>4</sub>. After filtration of MgSO<sub>4</sub> and evaporation of the solvent, recrystallization from ethanol gave **2a** (251 mg, 60%) as colorless crystals. The yield of **2a** was calculated that 1 mol of (**1'**·Li)<sub>2</sub>·(Et<sub>2</sub>O) gave 2 mol of **2a** in 100% yield. The yield of **2a** for two steps from **1** is 56%.

**2a**: colorless crystals, mp 150.0-152.5 °C. <sup>1</sup>H NMR (400 MHz, CDCl<sub>3</sub>) δ 0.36 (s, 9H), 1.16 (s, 9H), 7.17-7.22 (m, 2H), 7.33-7.40 (m, 7H), 7.55-7.60 (m, 4H), 7.76-7.80 (m, 1H). <sup>13</sup>C{<sup>1</sup>H} NMR (100 MHz, CDCl<sub>3</sub>) δ 3.23 (s), 35.41 (d, *J*<sub>PC</sub> = 10.7 Hz), 52.36 (d, *J*<sub>PC</sub> = 4.8 Hz), 127.45 (d, *J*<sub>PC</sub> = 15.3 Hz), 128.08 (d, *J*<sub>PC</sub> = 10.5 Hz), 129.21 (d, *J*<sub>PC</sub> = 2.9 Hz),

130.30 (d,  $J_{\text{PC}} = 2.9$  Hz), 133.12 (d,  $J_{\text{PC}} = 9.5$  Hz), 133.80 (d,  $J_{\text{PC}} = 18.1$  Hz), 136.84 (d,  $J_{\text{PC}} = 14.3$  Hz), 138.29 (d,  $J_{\text{PC}} = 75.3$  Hz), 140.90 (d,  $J_{\text{PC}} = 134.4$  Hz), 145.45 (d,  $J_{\text{PC}} = 12.4$  Hz).  $^{29}\text{Si}$  NMR (79 MHz,  $\text{CDCl}_3$ )  $\delta -2.8$ .  $^{31}\text{P}$  NMR (162 MHz,  $\text{CDCl}_3$ )  $\delta -1.9$ . Anal. Calcd for  $\text{C}_{25}\text{H}_{32}\text{NPSi}$ : C, 74.03; H, 7.95; N, 3.45. Found: C, 73.86; H, 8.06; N, 3.26%.

### Synthesis of [(2-dimethylphenylsilyl)phenyl]diphenylphosphine *tert*-Butylimide (**2b**)

Similarly to the synthesis of **2a**, reaction of the lithiated iminophosphorane  $(1' \cdot \text{Li})_2 \cdot (\text{Et}_2\text{O})$  (566 mg, 0.751 mmol) and chlorodimethylphenylsilane (0.280  $\mu\text{L}$ , 1.67 mmol) gave **2b** (442 mg, 63%) as colorless crystals. The yield of **2b** for two steps from **1** is 59%.

**2b**: colorless crystals, mp 130.0-132.5  $^{\circ}\text{C}$ .  $^1\text{H}$  NMR (400 MHz,  $\text{CDCl}_3$ )  $\delta$  0.68 (s, 6H), 1.08 (s, 9H), 7.17-7.66 (m, 19H).  $^{13}\text{C}\{^1\text{H}\}$  NMR (100 MHz,  $\text{CDCl}_3$ )  $\delta$  2.10 (s), 35.31 (d,  $J_{\text{PC}} = 9.9$  Hz), 52.42 (d,  $J_{\text{PC}} = 5.1$  Hz), 127.55 (s), 127.61 (d,  $J_{\text{PC}} = 12.4$  Hz), 128.04 (d,  $J_{\text{PC}} = 10.7$  Hz), 128.20 (s), 128.98 (d,  $J_{\text{PC}} = 2.4$  Hz), 130.31 (d,  $J_{\text{PC}} = 2.5$  Hz), 133.11 (d,  $J_{\text{PC}} = 9.1$  Hz), 133.72 (d,  $J_{\text{PC}} = 18.1$  Hz), 134.61 (s), 138.09 (d,  $J_{\text{PC}} = 75.9$  Hz), 138.85 (d,  $J_{\text{PC}} = 14.1$  Hz), 141.53 (d,  $J_{\text{PC}} = 135$  Hz), 142.92 (s), 142.93 (d,  $J_{\text{PC}} = 12.4$  Hz).  $^{29}\text{Si}$  NMR (79 MHz,  $\text{CDCl}_3$ )  $\delta -5.2$ .  $^{31}\text{P}$  NMR (162 MHz,  $\text{CDCl}_3$ )  $\delta -1.3$ . Anal. Calcd for  $\text{C}_{30}\text{H}_{34}\text{NPSi}$ : C, 77.05; H, 7.33; N, 3.00. Found: C, 76.95; H, 7.45; N, 2.95%.

### Synthesis of [(2-methyldiphenylsilyl)phenyl]diphenylphosphine *tert*-Butylimide (**2c**)

Chlorodiphenylsilane (190  $\mu\text{L}$ , 0.969 mmol) was added dropwise to  $(1' \cdot \text{Li})_2 \cdot (\text{Et}_2\text{O})$  (332 mg, 0.441 mmol) in diethyl ether (8 mL) at room temperature. The reaction mixture was stirred for 1 hour. After evaporation of the solvent, diethyl ether (15 mL) was added to the crude solid to dissolve it. Solid was removed by filtration and washed with diethyl ether (5 mL  $\times$  3). After concentration of the solution, recrystallization from diethyl ether gave **2c** (312 mg, 69%) as colorless crystals. The yield for two steps from **1** is 64%.

Spectral data of **2c**: mp 176-178  $^{\circ}\text{C}$ .  $^1\text{H}$  NMR (500 MHz,  $\text{C}_6\text{D}_6$ )  $\delta$  1.16 (s, 9H), 6.75 (s, 1H), 6.81-6.85 (m, 2H), 6.98-7.08 (m, 6H), 7.11-7.16 (m, 5H), 7.23-7.29 (m, 1H), 7.55-7.63 (m, 5H), 7.68-7.75 (m, 4H).  $^{13}\text{C}\{^1\text{H}\}$  NMR (126 MHz,  $\text{C}_6\text{D}_6$ )  $\delta$  34.82 (d,  $J_{\text{PC}} = 10.3$  Hz), 53.31 (d,  $J_{\text{PC}} = 4.7$  Hz), 127.77 (s, CH), 128.23 (d,  $J_{\text{PC}} = 10.8$  Hz, CH), 128.66 (d,  $J_{\text{PC}} = 14.5$  Hz, CH), 128.84 (s, CH), 129.57 (s, CH), 130.55 (s, CH), 132.32 (d,  $J_{\text{PC}} = 17.5$  Hz, CH), 133.42 (d,  $J_{\text{PC}} = 9.6$  Hz, CH), 136.74 (s, CH), 137.02 (d,  $J_{\text{PC}} = 71.3$  Hz), 139.42 (s), 139.53 (d,  $J_{\text{PC}} = 10.2$  Hz), 139.69 (d,  $J_{\text{PC}} = 13.0$  Hz, CH), 142.21 (d,  $J_{\text{PC}} =$

137.3 Hz).  $^{29}\text{Si}$  NMR (79 MHz,  $\text{C}_6\text{D}_6$ )  $\delta$  -26.4 (d,  $^1J_{\text{SiH}} = 231$  Hz).  $^{31}\text{P}$  NMR (162 MHz,  $\text{C}_6\text{D}_6$ )  $\delta$  -2.8 (s). Anal. Calcd for  $\text{C}_{30}\text{H}_{25}\text{NPSi}$ : C, 79.19; H, 6.65; N, 2.72. Found: C, 79.04; H, 6.86; N, 2.64%.

#### Reaction of **2c** with water.

To a  $\text{C}_6\text{D}_6$  (0.5 mL) solution of diphenylhydrosilane **2c** (31.3 mg, 0.0683 mmol) was added water (25  $\mu\text{L}$ ) at room temperature, and shaken for 10 minutes. After removal of the solvent under reduced pressure, recrystallization from diethyl ether/hexane gave **3** (28.0 mg, 87%) as colorless solid.

Spectral data of **3**: mp 180.0-181.0  $^\circ\text{C}$ .  $^1\text{H}$  NMR ( $\text{CDCl}_3$ , 300 MHz)  $\delta$  3.94 (d,  $J = 10.2$  Hz, 1H), 7.08 (td,  $J = 7.9$ , 1.6 Hz, 2H), 7.17-7.28 (m, 11H), 7.30-7.46 (m, 7H), 7.51 (t,  $J = 1.8$  Hz, 2H), 7.53 (t,  $J = 1.4$  Hz, 2H).  $^{13}\text{C}\{\text{H}\}$  NMR ( $\text{CDCl}_3$ , 75 MHz)  $\delta$  127.64 (s, CH), 128.31 (d,  $J = 6.9$  Hz, CH), 128.48 (s, CH), 128.57 (d,  $J = 1.1$  Hz, CH), 129.67 (s, CH), 130.04 (d,  $J = 0.8$  Hz, CH), 133.23 (d,  $J = 17.9$  Hz, CH), 135.10 (s, CH), 135.23 (d,  $J = 1.4$  Hz, CH), 135.90 (d,  $J = 0.9$  Hz, quaternary), 136.11 (d,  $J = 5.5$  Hz, CH), 136.85 (d,  $J = 5.9$  Hz, CH), 143.50 (d,  $J = 89.8$  Hz, quaternary), 143.84 (d,  $J = 50.9$  Hz, quaternary).  $^{29}\text{Si}$  NMR (79 MHz,  $\text{CDCl}_3$ )  $\delta$  -10.3.  $^{31}\text{P}$  NMR (162 MHz,  $\text{CDCl}_3$ )  $\delta$  -10.1. MS (FAB)  $m/z$  461 ( $\text{M}+\text{H}^+$ , 30%). IR ( $\text{CDCl}_3$ )  $\nu$  3445  $\text{cm}^{-1}$  (O-H).

#### Reaction of **2c** with methanol.

Three drops of dehydrated methanol were added to a THF (1 mL) solution of diphenylhydrosilane **2c** (10.8 mg, 20.9  $\mu\text{mol}$ ) at room temperature, and the reaction solution was stirred for 20 minutes. After removal of the solvent under reduced pressure, separation by preparative thin layer chromatography (silica gel, ethyl acetate:hexane = 1:4) gave **4** (6.4 mg, 64%) as colorless solid.

**4**: mp 123.0-123.8  $^\circ\text{C}$ .  $^1\text{H}$  NMR (500 MHz,  $\text{CDCl}_3$ )  $\delta$  3.52 (s, 3H), 6.93 (td,  $J = 1.0$ , 7.8 Hz, 4H), 7.14 (td,  $J = 1.5$ , 7.3 Hz, 4H), 7.17-7.24 (m, 7H), 7.31 (t,  $J = 7.5$  Hz, 2H), 7.36-7.44 (m, 2H), 7.65 (dd,  $J = 1.5$ , 9.0 Hz, 4H), 7.90-7.94 (m, 1H).  $^{13}\text{C}\{\text{H}\}$  NMR (75 MHz,  $\text{CDCl}_3$ )  $\delta$  51.66 (d,  $J = 1.7$  Hz,  $\text{CH}_3$ ), 127.52 (s, CH), 127.87 (s, CH), 127.99 (d,  $J = 6.3$  Hz, CH), 128.57 (d,  $J = 0.7$  Hz, CH), 129.52 (s, CH), 130.23 (s, CH), 133.11 (d,  $J = 18.4$  Hz, CH), 134.81 (d,  $J = 3.2$  Hz, quaternary), 135.57 (d,  $J = 1.5$  Hz, CH), 135.67 (d,  $J = 2.9$  Hz, CH), 136.83 (d,  $J = 16.7$  Hz, CH), 137.76 (d,  $J = 11.7$  Hz, quaternary), 143.02 (d,  $J = 103.0$  Hz, quaternary), 143.42 (d,  $J = 68.2$  Hz, quaternary).  $^{29}\text{Si}$  NMR (99 MHz,

$\text{CDCl}_3$ )  $\delta$  -12.5.  $^{31}\text{P}\{^1\text{H}\}$  NMR (162 MHz,  $\text{CDCl}_3$ )  $\delta$  -10.3. ESI-MS  $m/z$  475.16 (M+H).

### Crystallographic analysis of **2a** and **2c**.

All data for **2a** and **2c** were recorded on a Rigaku Mercury CCD diffractometer with graphite monochromated Mo-K $\alpha$  radiation ( $\lambda = 0.71070$  Å). Data were collected and processed using CrystalClear (Rigaku). The data were corrected for Lorentz and polarization effects. The structure was solved by direct methods (SHELX-97) and expanded using Fourier techniques (Sheldrick, G. M. SHELXL-97, Program for the Refinement of Crystal Structures; University of Göttingen, Göttingen, Germany, 1997). The non-hydrogen atoms were refined anisotropically. Hydrogen atoms were refined isotropically. Crystallographic data are shown below

Crystallographic data of **2a**:  $\text{C}_{25}\text{H}_{32}\text{NPSi}$ ,  $M = 405.58$ , monoclinic, space group  $P2_1/n$ ,  $Z = 4$ ,  $a = 8.745(2)$ ,  $b = 16.531(4)$ ,  $c = 16.017(4)$  Å,  $\beta = 97.8059(11)^\circ$ ,  $U = 2294.0(10)$  Å<sup>3</sup>,  $T = 120(2)$  K,  $\mu(\text{Mo-K}\alpha) = 0.183$  mm<sup>-1</sup>,  $D_{\text{calc}} = 1.076$  g cm<sup>-3</sup>,  $R1 = 0.0335$  ( $I > 2\sigma(I)$ ),  $wR2 = 0.0928$  (all data), GOF = 1.076. CCDC-867751.

Crystallographic data of **2c**:  $\text{C}_{34}\text{H}_{34}\text{NPSi}$ ,  $M = 515.68$ , monoclinic, space group  $Cc$ ,  $Z = 4$ ,  $a = 17.002(9)$ ,  $b = 8.839(5)$ ,  $c = 20.361(12)$  Å,  $\beta = 112.6137(19)^\circ$ ,  $U = 2825(3)$  Å<sup>3</sup>,  $T = 120(2)$  K,  $\mu(\text{Mo-K}\alpha) = 0.163$  mm<sup>-1</sup>,  $D_{\text{calc}} = 1.213$  g cm<sup>-3</sup>,  $R1 = 0.0402$  ( $I > 2\sigma(I)$ ),  $wR2 = 0.0390$  (all data), GOF = 0.0790. CCDC-867750.
